# Supplementary material for: Effect of chloride salts and microwaves on polyethylene terephthalate (PET) hydrolysis by iron chloride/acetic acid Lewis/Brønsted acidic deep eutectic solvent
Source: Royal Society of Chemistry journal article supplement (doi:10.1039/d3su00205e), 2023-11-21
Supplement: d3su00205e1.pdf [file d3su00205e1.pdf]

## SUPPORTING INFORMATION

# Effect of chloride salts and microwave on polyethylene terephthalate (PET) hydrolysis by iron chloride/acetic acid Lewis/Brønsted acidic deep eutectic solvent

Marco Rollo,<sup>a</sup> Massimo Perini,<sup>a</sup> Alessandro Sanzone,<sup>b</sup> Lorenzo Polastri,<sup>b</sup> Matteo Tiecco,<sup>c</sup> Alejandro Torregrosa-Chinillach,<sup>d</sup> Elisa Martinelli,<sup>a,\*</sup> Gianluca Ciancaleoni<sup>a,\*</sup>

<sup>a</sup> Department of Chemistry and Industrial Chemistry, University of Pisa, via Giuseppe Moruzzi 13, I-56124 Pisa, Italy

<sup>b</sup> gr3n SA, Via Probello 19, 6963 Lugano, Switzerland

<sup>c</sup> Chemistry Interdisciplinary Project (ChIP), School of Pharmacy, University of Camerino, via Madonna delle Carceri, 62032 Camerino, MC, Italy

<sup>d</sup> Department of Organic Chemistry, Faculty of Sciences, Institute of Organic Synthesis (ISO), University of Alicante, Apdo. 99, 03080 Alicante, Spain

Corresponding authors: [elisa.martinelli@unipi.it](mailto:elisa.martinelli@unipi.it); [gianluca.ciancaleoni@unipi.it](mailto:gianluca.ciancaleoni@unipi.it)

**Table S1.** Experimental melting points of **LBDES1** (average of four measurements).

| x( $\text{FeCl}_3 \cdot 6\text{H}_2\text{O}$ ) | x(acetic acid) | $T_m$ (K)           |
|------------------------------------------------|----------------|---------------------|
| 1                                              | 0              | 310.15 <sup>a</sup> |
| 0.75                                           | 0.25           | 219.9 $\pm$ 2.75    |
| 0.67                                           | 0.33           | 215.4 $\pm$ 0.75    |
| 0.5                                            | 0.5            | 209.35 $\pm$ 2.8    |
| 0.33                                           | 0.67           | 211.75 $\pm$ 1.2    |
| 0                                              | 1              | 289.6 <sup>b</sup>  |

<sup>a</sup> From PubChem, ref 1; <sup>b</sup> From National Institute of Standards and Technology, ref 2

**Table S2.** Density values of **LBDES1** at different temperatures, in the absence and presence of  $\text{CaCl}_2$  (**LBDES2**).

| T (°C) | Density (g/mL) |               |
|--------|----------------|---------------|
|        | <b>LBDES1</b>  | <b>LBDES2</b> |
| 15     | 1.5188         | 1.5291        |
| 20     | 1.5092         | 1.5189        |
| 25     | 1.4997         | 1.5089        |
| 30     | 1.4903         | 1.4990        |
| 35     | 1.4810         | 1.4893        |
| 40     | 1.4718         | 1.4799        |
| 45     | 1.4627         | 1.4706        |
| 50     | 1.4538         | 1.4615        |
| 55     | 1.4449         | 1.4527        |
| 60     | 1.4363         | 1.4440        |

**Table S3.** Conductivity values of **LBDES1** at different temperatures, in the absence and presence of  $\text{CaCl}_2$  (**LBDES2**).

| T (°C) | $\sigma$ (mS/cm) |               |
|--------|------------------|---------------|
|        | <b>LBDES1</b>    | <b>LBDES2</b> |
| 15     | 5.58             | 11.69         |
| 20     | 7.38             | 14.8          |
| 25     | 9.68             | 18.51         |
| 30     | 13.47            | 22.3          |
| 35     | 16.57            | 26.9          |
| 40     | 20.2             | 31.3          |
| 45     | 24.1             | 36.5          |
| 50     | 28.6             | 41.6          |
| 55     | 33.2             | 46.8          |
| 60     | 37.8             | 48.6          |

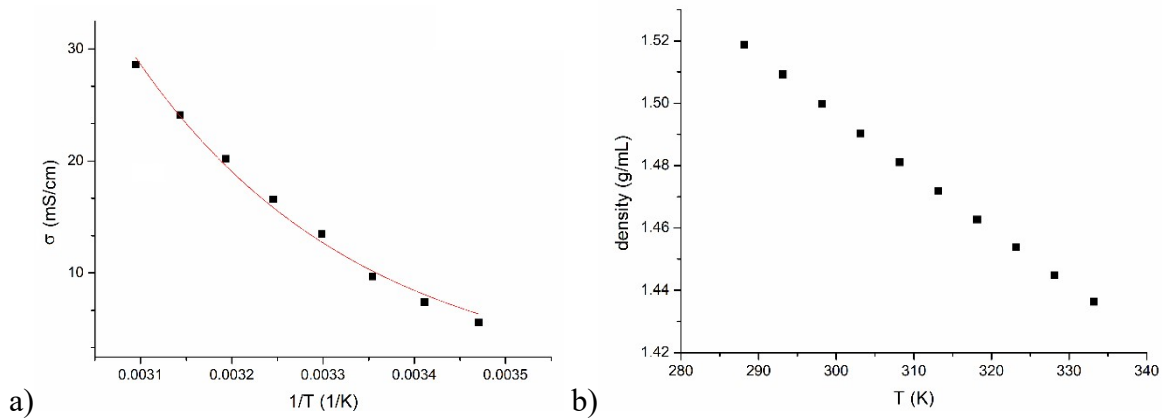

**Figure S1.** Graphical trends of (a) conductivity and (b) density of **LBDES1** with temperature. For conductivity data, the exponential fitting equation is  $\sigma = (9 \pm 4)10^6 \exp((4100 \pm 200)/T)$  ( $r^2 = 0.9921$ ).

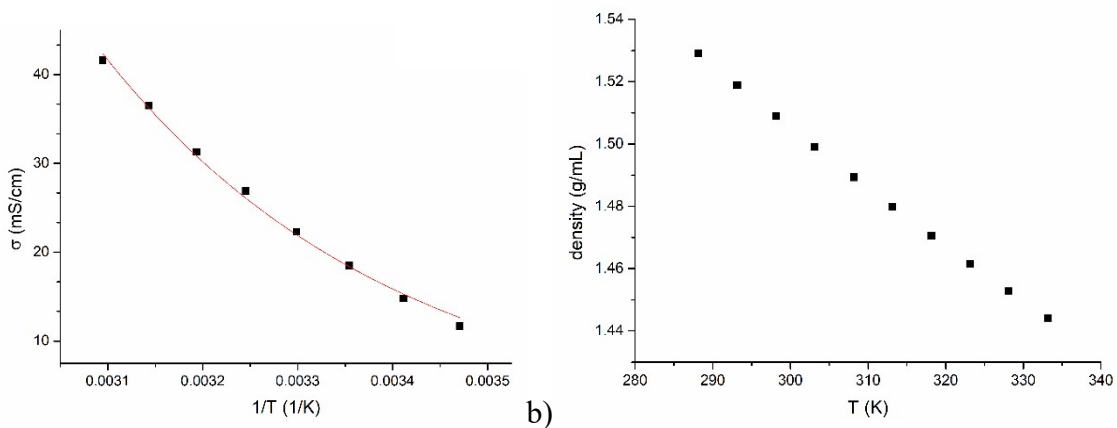

**Figure S2.** Graphical trends of (a) conductivity and (b) density of **LBDES2** with temperature. For conductivity data, the exponential fitting equation is  $\sigma = (9 \pm 2)10^5 \exp((3220 \pm 80)/T)$  ( $r^2 = 0.9958$ ).

**Table S4.** Melting point ( $T_m$ , °C) of **LBDES1** with the addition of different aliquots of  $\text{CaCl}_2$ .

| $\text{CaCl}_2$ (eq) | $T_m$ |
|----------------------|-------|
| 0                    | -60.0 |
| 1                    | -59.0 |
| 2                    | -59.3 |
| 3                    | -59.3 |
| 4                    | -63.7 |

## IR and NMR spectra

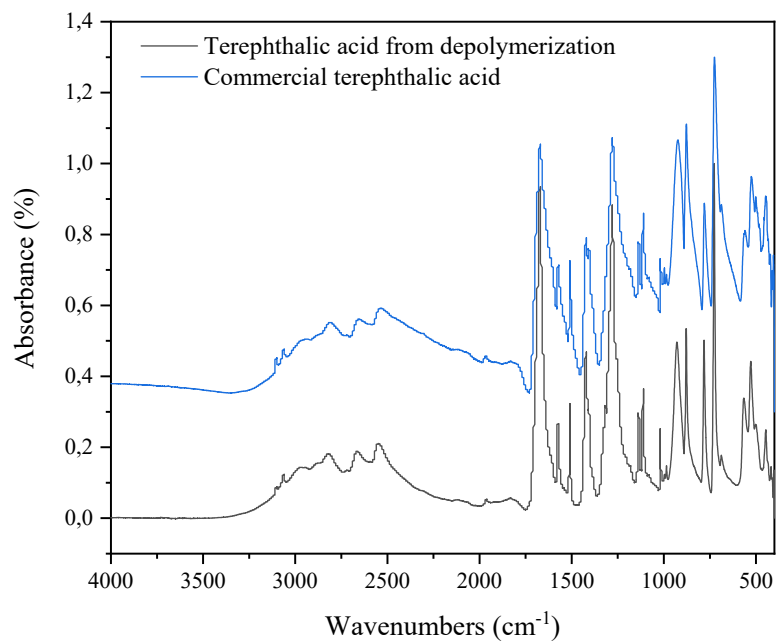

**Figure S3.** Scan range 400-4000  $\text{cm}^{-1}$ , 32 scans, resolution 4  $\text{cm}^{-1}$ .

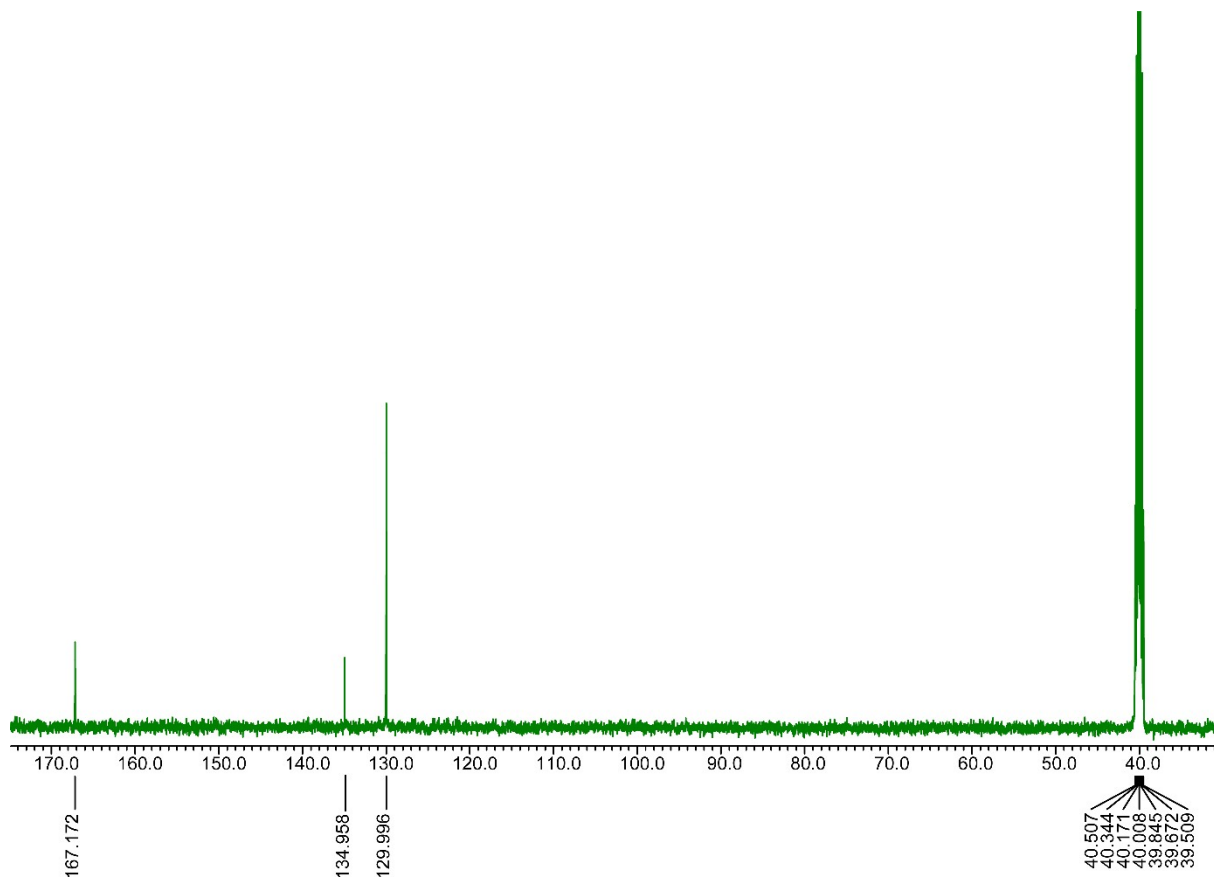

**Figure S4.**  $^{13}\text{C}\{^1\text{H}\}$  NMR spectrum (solvent DMSO- $d_6$ , room temperature) of TA resulting from the depolymerization of PET by using  $\text{FeCl}_3 \cdot 6\text{H}_2\text{O}$ /acetic acid (1:1) and improved work-up (see main text).

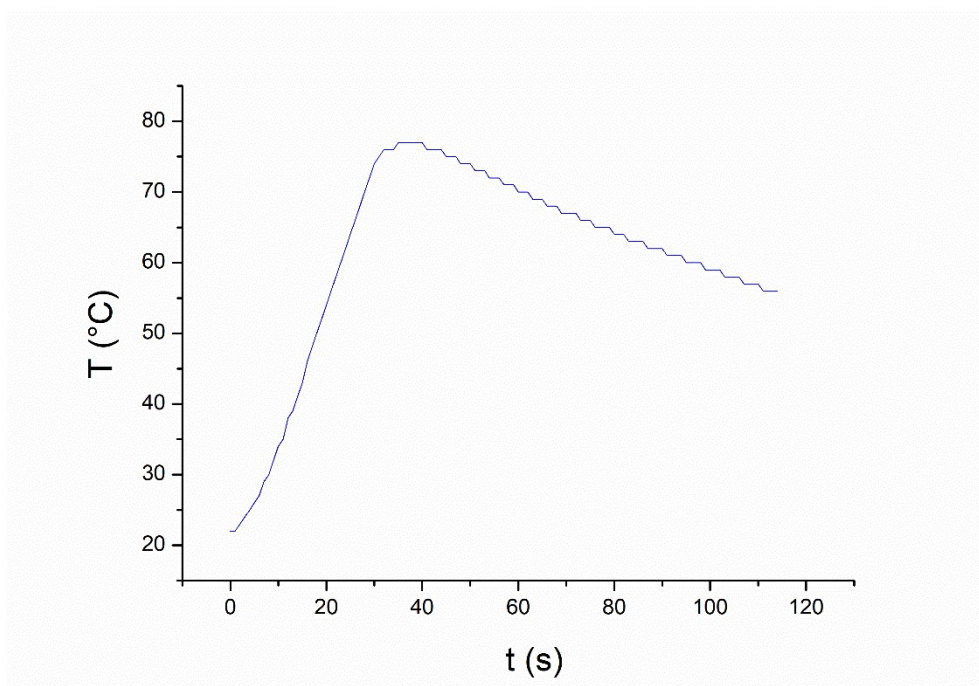

**Figure S5.** Temperature change of 8 g of deionized water under a microwave irradiation of 100 W for 30 s.

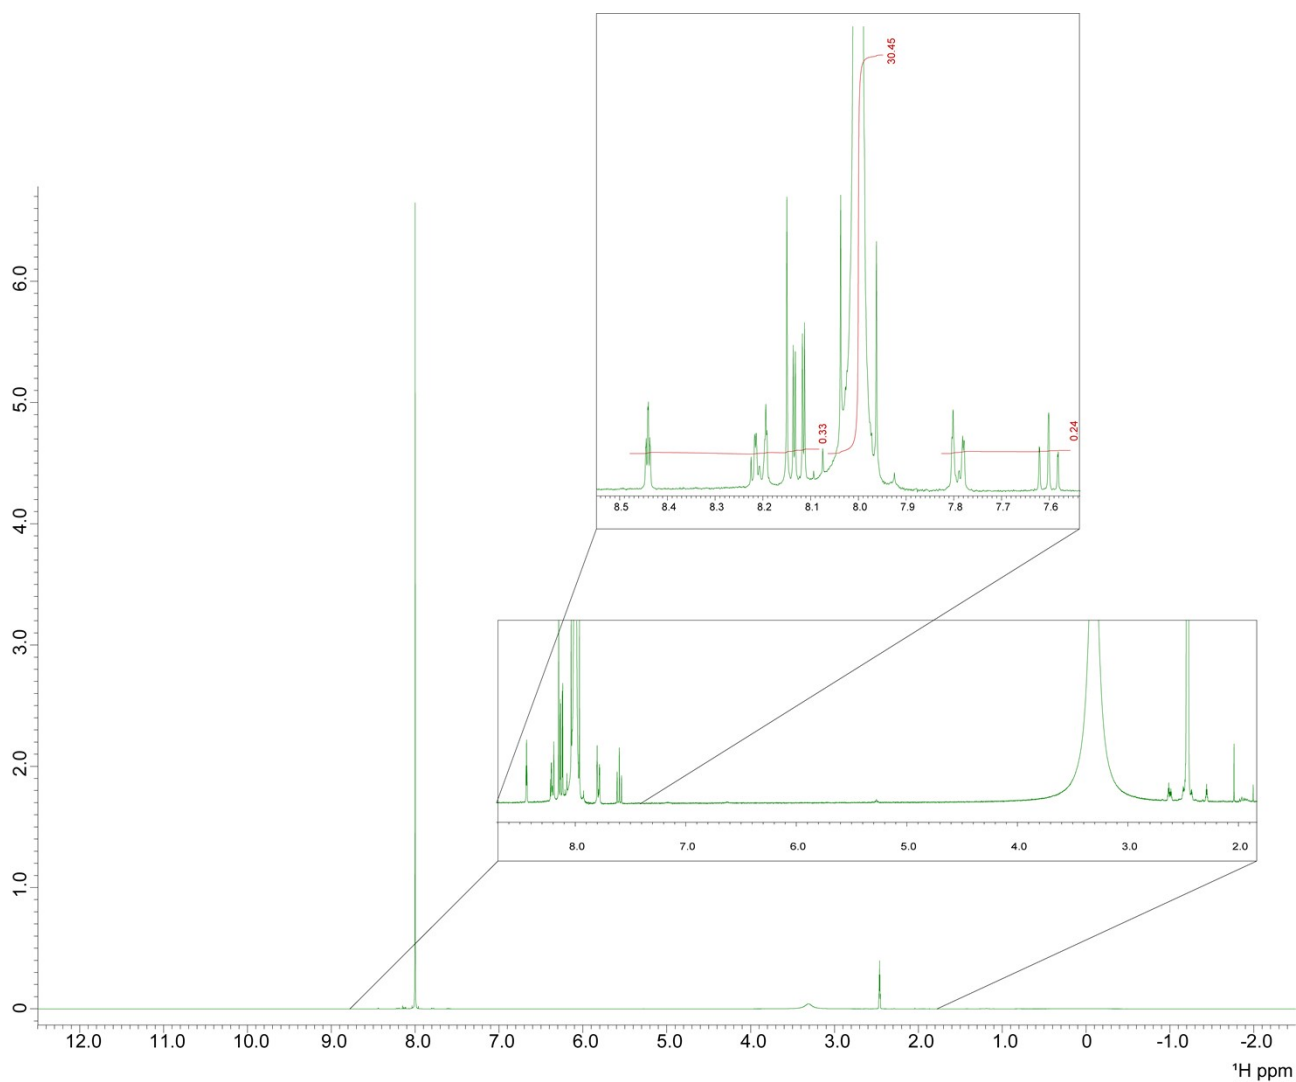

**Figure S6.**  $^1\text{H}$  NMR spectrum (solvent DMSO- $d_6$ , room temperature) of TA resulting from the depolymerization of PET at 180 °C under MW irradiation. The large peak at 8 ppm is due to TA, the small peaks around it are due to impurities present in post-consume bottles (as isophthalic acid and benzoic acid). Any peaks due to bis(2-hydroxyethyl) terephthalate would be present in the 3.8-4.3 ppm (two triplets) but the zone is clean.

## References

- (1) <https://pubchem.ncbi.nlm.nih.gov/compound/Ferric-chloride>.
- (2) <https://webbook.nist.gov/cgi/cbook.cgi?ID=C64197&Mask=4>.
